# Supplementary material
Source: PubMed Central journal article supplement (PMC3659982)
Supplement: supp_2012.065599_2012_065599-Contributions.pdf [file supp_2012.065599_2012_065599-Contributions.pdf]

**Manuscript no. HAEMATOL/2012/065599 entitled “The combination of Sirolimus plus Tacrolimus improves outcome after reduced-intensity conditioning unrelated donor hematopoietic stem cell transplantation compared with Cyclosporine plus Mycophenolate”**

**Authors: Jose Antonio Perez-Simón, Rodrigo Martino, Rocío Parody, Mónica Cabrero, Lucía Lopez-Corral, David Valcarcel, Carmen Martinez, Carlos Solano, Lourdes Vazquez, Francisco J. Márquez-Malaver, Jordi Sierra, and Dolores Caballero**

**Information about the contributions of each person named as having participated in the study**

**1) Guarantor(s), i.e., person(s) who is (are) responsible for the integrity of the work as a whole:**

- Dr Jose Antonio Pérez-Simón, Hospital Universitario Virgen del Rocío, Instituto de Biomedicina de Sevilla (IBIS)/CSIC/Universidad de Sevilla, Avenida de Manuel Siurot s/n 41013, Sevilla, Spain. E-mail: [josea.perez.simon.sspa@juntadeandalucia.es](mailto:josea.perez.simon.sspa@juntadeandalucia.es)

According to the International Committee of Medical Journal Editors (ICMJE) ([http://www.icmje.org/ethical\\_1author.html](http://www.icmje.org/ethical_1author.html)): “Authorship credit should be based on: 1) substantial contributions to conception and design, acquisition of data, or analysis and interpretation of data; 2) drafting the article or revising it critically for important intellectual content; and 3) final approval of the version to be published. Authors should meet conditions 1, 2, and 3 ..... Acquisition of funding, collection of data, or general supervision of the research group alone does not constitute authorship”.

The guarantors of this manuscript confirm that all persons designated as authors qualify for authorship, and that each author has participated sufficiently in the work to take public responsibility for appropriate portions of the content.

**2) Authors who participated in the conception of the study:**

- Jose Antonio Perez-Simón
- Dolores Caballero

**3) Design & Methods. The following authors were responsible for specific investigations:**

- Rodrigo Martino was responsible for design and statistical analysis
- Francisco Marquez was responsible for statistical analysis

**4) Results. The following authors were responsible for specific portions of the results, including figures and tables:**

- Mónica Cabrero was responsible for data collection and patients management
- Lucía Lopez-Corral was responsible for data collection and patients management
- David Valcarcel was responsible for data collection and patients management
- Carmen Martinez was responsible for data collection and patients management
- Carlos Solano was responsible for data collection and patients management
- Lourdes Vazquez was responsible for data collection and patients management

**5) Writing the manuscript. The following authors were responsible for writing the manuscript:**

- Rocío Parody
- Jose Antonio Perez-Simón
- Jordi Sierra
- Dolores Caballero

**6) Contributors Listed in Acknowledgments:**  
Not applicable
